# Supplementary material for: Diagnostic accuracy of blood tests of inflammation in paediatric appendicitis: a systematic review and meta-analysis
Source: HighWire-hosted journal article supplement (doi:10.1136/bmjopen-2021-056854), 2022-11-01

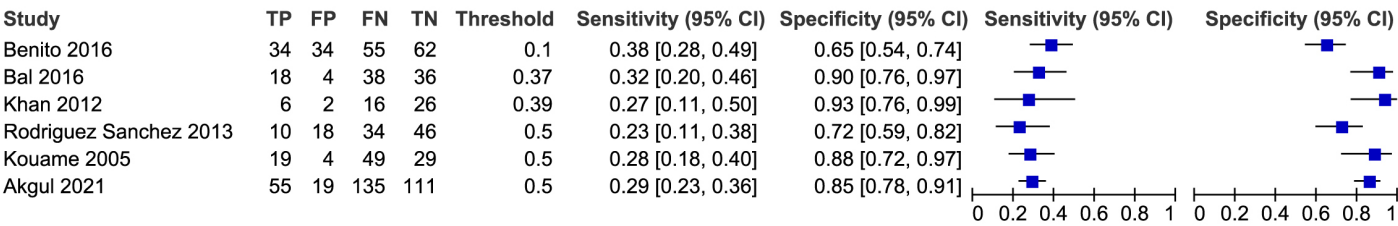

Supplement: bmjopen-2021-056854supp006_data_supplement.pdf [file bmjopen-2021-056854supp006_data_supplement.pdf]
